# Supplementary material for: A protocol for vulnerability and exposure assessment in rapid extreme event attribution studies
Source: Copernicus journal article supplement (doi:10.5194/egusphere-2025-6568), 2026-01-13
Supplement: Supplementary file 1 [file egusphere-2025-6568-supplement.pdf]

## Supplementary material

This supplementary material presents the updated hazard-specific vulnerability templates for multiple climate hazards (extreme temperatures, drought, wildfires, floods, storms).

### Extreme Temperatures (heatwaves and coldwaves)

| Key Themes                                | Factors                                                                                                                                                                                                                                                                                                            | Guiding questions                                                                                                                                                                                                                                                                                                                                                                                                                                                                                                                |
|-------------------------------------------|--------------------------------------------------------------------------------------------------------------------------------------------------------------------------------------------------------------------------------------------------------------------------------------------------------------------|----------------------------------------------------------------------------------------------------------------------------------------------------------------------------------------------------------------------------------------------------------------------------------------------------------------------------------------------------------------------------------------------------------------------------------------------------------------------------------------------------------------------------------|
| <b>Hazard characteristics and impacts</b> | albedo<br>heat duration<br>natality and mortality<br>speed of temperature change<br>altitude<br>geographic location<br>air pollution<br>climatic pre-conditions<br>moderate winter climates                                                                                                                        | What are the characteristics of the heat/cold wave including timing, location, intensity, length and compounding hazards?<br><br>What heat or cold-related impacts are known in the affected area (e.g. mortality, morbidity, disruptions to key sectors)?<br><br>How do the impacts reported to date compare to similar heat or cold waves experienced in the past?<br><br>Are there any compounding or cascading impacts (e.g. on food security)?<br><br>Are there existing heat/cold risk maps for the location of the study? |
| Geophysical                               | terrain conditions<br>high impervious surface ratio<br>low albedo surfaces<br>low sky view factor<br>thermal radiation and heat flux<br>surface temperature<br>low soil moisture<br>landform/elevation<br>vegetation cover<br>fire-prone ecosystems<br>natural ventilation                                         | Describe the urban heat island effect in the impacted city(ies).<br><br>What are the differences between cities, between city and rural areas, and micro-islands within cities?                                                                                                                                                                                                                                                                                                                                                  |
| <b>Sociodemographics</b>                  | family structure<br>homeless populations<br>household availability<br>isolation<br>race and ethnicity<br>single-household residents<br>working and living conditions<br>population density<br>minority groups<br>total civilian non-institutionalized population<br>education<br>illiteracy<br>alcohol consumption | Who are the most vulnerable groups specific to the location of the study and hazard? Why are those people vulnerable?<br><br>Do the most vulnerable populations disproportionately live and work in hotter areas of the city [heat island effect]?<br><br>Are there gaps in people's ability to access services based on sociodemographics?<br><br>What is the human development index in the countries that are covered by the extreme heat or cold?                                                                            |

|          |                                                                                                                                                                                                                                                                                                                                                                                                                                                                                                                                                                                                                                                                                                                                                                                                                                      |                                                                                                                                                                                                               |
|----------|--------------------------------------------------------------------------------------------------------------------------------------------------------------------------------------------------------------------------------------------------------------------------------------------------------------------------------------------------------------------------------------------------------------------------------------------------------------------------------------------------------------------------------------------------------------------------------------------------------------------------------------------------------------------------------------------------------------------------------------------------------------------------------------------------------------------------------------|---------------------------------------------------------------------------------------------------------------------------------------------------------------------------------------------------------------|
|          | <p>individuals with limited mobility</p>                                                                                                                                                                                                                                                                                                                                                                                                                                                                                                                                                                                                                                                                                                                                                                                             | <p>Are there relevant historic processes/policies/events influencing vulnerability and exposure, such as systematic exclusion, conflict, political instability, and colonialism?</p>                          |
| Health   | <p> substance users<br/> disability or mobility issues<br/> acclimatization (or lack of)<br/> chronic health conditions<br/> cognitive impairments<br/> confinement to bed<br/> dependent on caregivers<br/> mobility<br/> people with psychiatric illness<br/> physical and mental health<br/> higher number of co-morbidities<br/> asthma<br/> diabetes<br/> gender disparities<br/> pregnancy<br/> sex<br/> age<br/> life expectancy<br/> cardiovascular disease<br/> dementia<br/> diabetes<br/> digestive diseases<br/> endocrine diseases<br/> history of respiratory illness<br/> hormone levels<br/> immune function<br/> injury<br/> issues with thermoregulation<br/> medications<br/> mental illness<br/> nervous system diseases<br/> nutrition conditions<br/> populations with diseases of the circulatory system </p> | <p>Are there a large number of people who are known to be more physiologically vulnerable to extreme heat or cold in the study area?</p> <p>Are there gender and age-based differences in those impacted?</p> |
| Cultural | <p> foreign-born population<br/> language ability<br/> caste<br/> social class<br/> behavioral characteristics<br/> cultural unfamiliarity with heat/cold<br/> having more social activities<br/> aboriginal status<br/> indigenous populations<br/> tribe<br/> living habits and routines </p>                                                                                                                                                                                                                                                                                                                                                                                                                                                                                                                                      | <p>Are there cultural differences in the population that would increase risk?</p>                                                                                                                             |

|                                                   |                                                                                                                                                                                                                                                                                                                                                                                                                                                                                                                                                                                                                                                                               |                                                                                                                                                                                                                                                                                                                                                                                                    |
|---------------------------------------------------|-------------------------------------------------------------------------------------------------------------------------------------------------------------------------------------------------------------------------------------------------------------------------------------------------------------------------------------------------------------------------------------------------------------------------------------------------------------------------------------------------------------------------------------------------------------------------------------------------------------------------------------------------------------------------------|----------------------------------------------------------------------------------------------------------------------------------------------------------------------------------------------------------------------------------------------------------------------------------------------------------------------------------------------------------------------------------------------------|
| <b>Economic context, capacity and livelihoods</b> | GDP per capita<br>job specification<br>economic or income levels<br>education<br>high-risk occupations<br>household income<br>occupational exposure<br>physically active jobs<br>poverty<br>outdoor or manual labor<br>unemployment/employment<br>workload duration and severity<br>health worker<br>socio-economic deprivation                                                                                                                                                                                                                                                                                                                                               | What are the major income-generating sectors for the country, and are they affected by heat or cold risks?<br><br>Are any temperature-related worker safety laws in place, planned, or discussed? Are there known or likely gaps in existing laws or barriers to developing new laws?<br><br>Are there examples of maladaptation?                                                                  |
| Agriculture                                       | cropland exposure<br>eroded or degraded soils<br>food-insecure regions<br>land cover/use<br>monoculture farming systems<br>agricultural population<br>deforestation and land degradation<br>limited irrigation infrastructure                                                                                                                                                                                                                                                                                                                                                                                                                                                 | What is known about the risks faced by agricultural workers in the affected areas (mortality, morbidity, labor productivity loss, crop/livestock loss, etc) and how does it compare to other groups?<br><br>Do those working in agriculture-related jobs have access to cooling interventions?<br><br>What are heat/cold-related vulnerabilities of the food production system itself?             |
| <b>Urban built environment</b>                    | urban heat island effect<br>density of highways<br>building density<br>community center<br>row house structures<br>living in old structures<br>landscape of urban periphery<br>non-opening windows<br>poor ventilation<br>surface material<br>heat-retaining materials<br>limited shade or cooling<br>heat-prone neighborhoods<br>poor urban planning<br>thermal comfort-based urban planning<br>weak urban governance<br>urban population<br>urbanization rate<br>living in high-density<br>living in hot neighborhoods<br>living in inner city<br>overcrowded living<br>proximity to city center<br>street canyon effects<br>street design<br>high-rise buildings<br>cities | How are neighborhoods and housing organized? How does it affect vulnerability or exposure to cold or heat?<br><br>How is the urban planning of the city either exacerbating or helping to reduce heat/cold risks, intentionally or unintentionally? What do we know about future urban plans?<br><br>Are there examples of maladaptation?<br><br>Are there any limits to adaptation, hard or soft? |

|                                      |                                                                                                                                                                                                                                                                                                                                                                                                                                                                                                                                                                                                                                                                                                                                                                                  |                                                                                                                                                                                                                                                                                                                                                                                                                                                                                                                                                                                                                                                                                                                                                                                                       |
|--------------------------------------|----------------------------------------------------------------------------------------------------------------------------------------------------------------------------------------------------------------------------------------------------------------------------------------------------------------------------------------------------------------------------------------------------------------------------------------------------------------------------------------------------------------------------------------------------------------------------------------------------------------------------------------------------------------------------------------------------------------------------------------------------------------------------------|-------------------------------------------------------------------------------------------------------------------------------------------------------------------------------------------------------------------------------------------------------------------------------------------------------------------------------------------------------------------------------------------------------------------------------------------------------------------------------------------------------------------------------------------------------------------------------------------------------------------------------------------------------------------------------------------------------------------------------------------------------------------------------------------------------|
| Infrastructure                       | building age<br>building orientation<br>coastal dwelling<br>construction materials<br>top-flood apartments<br>living on the top floor<br>pollutant exposure<br>roofs incoming solar radiation<br>housing condition<br>building materials<br>housing type<br>other housing characteristics                                                                                                                                                                                                                                                                                                                                                                                                                                                                                        | <p>Which structural strategies have been implemented on household level to mitigate heat risk (e.g. cool roof technologies, access to cooling devices, etc)?</p> <p>Do we know to what degree these are systematically implemented across the affected area? Are there gaps or barriers?</p>                                                                                                                                                                                                                                                                                                                                                                                                                                                                                                          |
| Informality                          | rural and informal settlements<br>home ownership<br>rental housing dependence<br>under-representation in research<br>low levels of housing<br>homelessness<br>homeless shelters<br>informal/slum settlements                                                                                                                                                                                                                                                                                                                                                                                                                                                                                                                                                                     | <p>What does informality look like in this city (housing stock, building material, social connectivity, access to services and cooling/heating measures, location, size of households) and how does that impact people's vulnerability and exposure to heat or cold?</p>                                                                                                                                                                                                                                                                                                                                                                                                                                                                                                                              |
| <b>Critical systems and services</b> | heating/cooling<br>communication technologies<br>air quality<br>high energy costs<br>vehicle availability<br>proximity to public transportation<br>energy-inefficient<br>design/power grid overload<br>medical infrastructure<br>walking time to clinic<br>electricity supply<br>AC dependence<br>healthcare services<br>ecosystem conversation<br>proximity to<br>green/water/cooling<br>proximity to hospitals<br>lack of green cover<br>lack of green spaces<br>lack of microclimate design<br>lack of shading<br>lack of water features<br>limited access to services<br>open spaces<br>wind and water use<br>bathing water (in context of housing conditions)<br>drinking water availability<br>occupied housing units:<br>lacking complete plumbing<br>health care systems | <p>Do people have access to green spaces or ecosystem services? Are there gaps in access, if so where and who tends to lack access?</p> <p>Are there cascading risks on food security and what actions are reducing or exacerbating those risks?</p> <p>Are systems and services (e.g health, transport, water) able to expand to meet increased demand and/or pressure during extreme heat or cold?</p> <p>If any of these systems failed, why did they fail? If they were highly stressed and they did not fail, is there a reason behind this?</p> <p>Is there a provision to avoid water and electricity shutoffs during a heat/cold wave?</p> <p>Are there key spatial gaps in the distribution of the system that intersect with vulnerability?</p> <p>Are there examples of maladaptation?</p> |

| Heat/Cold risk management |                                                                                                                                                                                                                         |                                                                                                                                                                                                                                                                                                                                                                                                                                                                       |
|---------------------------|-------------------------------------------------------------------------------------------------------------------------------------------------------------------------------------------------------------------------|-----------------------------------------------------------------------------------------------------------------------------------------------------------------------------------------------------------------------------------------------------------------------------------------------------------------------------------------------------------------------------------------------------------------------------------------------------------------------|
| Governance                | <p>Poor disaster governance<br/>data and measurement gaps<br/>lack of integrated planning<br/>poor risk communication<br/>uncoordinated disaster management</p>                                                         | <p>Is heat/cold risk integrated into key plans and policies across sectors? (ie. disaster management, urban planning, education)?</p> <p>Which agencies are integrating heat or cold into their plans across timescales?</p> <p>How are they coordinating with each other? Are there governance challenges?</p>                                                                                                                                                       |
| Policies and plans        | <p>accessibility to cooling/heating space<br/>heat/cold protection measures<br/>lack of cooling/heating infrastructure<br/>lack of localized heat/cold plans<br/>lack of preparedness measures</p>                      | <p>Does the region have a Heat/Cold Action Plan for heatwaves? If so, does the HAP include risk reduction action across timescales?</p> <p>Was action taken in the pre-heat season to build capacity and preparedness (e.g. training, awareness raising campaigns)?</p> <p>Have there been updates to the Heat/Cold Action Plan (if existing) based on lessons from previous heat/cold waves?</p>                                                                     |
| Early Warning System      | <p>ineffective early warnings<br/>lack of monitoring systems<br/>limited heat risk awareness<br/>limited public outreach<br/>weak climate services</p>                                                                  | <p>Does the region have a functional heat/cold wave early warning system?</p> <p>Was this heat/cold wave forecasted? If so, with what lead time, accuracy, etc.?</p> <p>Were there internal government and/or public warnings of the heat/cold wave? If so, what do we know about who can access the information; are there any gaps and other challenges?</p> <p>What early actions were implemented immediately before or during the early stages of the event?</p> |
| Emergency response        | <p>poor emergency protocols<br/>distance from hospital<br/>having an emergency button<br/>lack of emergency capacity<br/>lack of emergency planning<br/>underfunded response systems<br/>proximity to cool shelters</p> | <p>Did the government declare a state of emergency or equivalent?</p> <p>What response actions were taken by the government, city authorities or implementing partners?</p> <p>What personal coping strategies have been implemented during the heatwave?</p> <p>Is there evidence on effective cooling interventions for the location affected?</p> <p>Are there any trade-offs or gaps in implementing or accessing interventions (e.g. financial barriers to</p>   |

|                                           |                                                                                                                                                                                                  |                                                                                                                                                                                                                                                                                                                                                                 |
|-------------------------------------------|--------------------------------------------------------------------------------------------------------------------------------------------------------------------------------------------------|-----------------------------------------------------------------------------------------------------------------------------------------------------------------------------------------------------------------------------------------------------------------------------------------------------------------------------------------------------------------|
|                                           |                                                                                                                                                                                                  | <p>purchasing cooling or heating devices or increasing water, rest, shade)?</p> <p>Do the implemented response actions address gaps in people's access to critical services and systems? If yes, are they based on income, demographics, distances, stigma, etc.?</p> <p>What was planned but didn't happen, or not planned that probably should have been?</p> |
| Individual and household coping behaviors | <p>low behaviour adjustment</p> <p>limited education and awareness</p> <p>low adaptive capacity</p> <p>high risk perception</p> <p>reduced risk awareness</p> <p>barriers to behavior change</p> | What positive or negative coping strategies are being used at the individual and household level?                                                                                                                                                                                                                                                               |
| Insurance and social protection           | <p>no private insurance</p> <p>receiving social benefits</p> <p>health insurance</p>                                                                                                             | Are there shock-responsive social protection programmes that have been utilised or upscaled during the event?                                                                                                                                                                                                                                                   |

## Drought

| Key Themes                                | Factors                                                                                                                                    | Guiding questions                                                                                                                                                                                                                                                                                                                                                                                                                                                                                                                                                                                                                                                           |
|-------------------------------------------|--------------------------------------------------------------------------------------------------------------------------------------------|-----------------------------------------------------------------------------------------------------------------------------------------------------------------------------------------------------------------------------------------------------------------------------------------------------------------------------------------------------------------------------------------------------------------------------------------------------------------------------------------------------------------------------------------------------------------------------------------------------------------------------------------------------------------------------|
| <b>Hazard characteristics and impacts</b> | <p>drought characteristics</p> <p>temperature</p> <p>precipitation</p> <p>rainfall departure</p> <p>evaporation</p> <p>solar radiation</p> | <p>What are the characteristics of the drought (location, timing, intensity, duration)?</p> <p>What drought risk maps exist?</p> <p>What kind of drought is it (agricultural, hydrological, or socioeconomic)?</p> <p>What drought-related risks are known in the affected area (mortality, morbidity, key sectors and infrastructure)?</p> <p>How do the impacts reported to date compare to similar droughts experienced in the past?</p> <p>Are there relevant compounding hazards and cascading impacts (e.g. wildfires, air pollution, heat etc.) or events (e.g. inflation and high prices, health crises, cultural events, conflict) that are worsening impacts?</p> |
| Geophysical                               | <p>elevation</p> <p>potential water storage of soil</p> <p>slope (%)</p>                                                                   | How do the physical characteristics of the drought area contribute to or reduce drought risk?                                                                                                                                                                                                                                                                                                                                                                                                                                                                                                                                                                               |

|                                                   |                                                                                                                                                                                                                                                                                                                                                                                                                                |                                                                                                                                                                                                                                                     |
|---------------------------------------------------|--------------------------------------------------------------------------------------------------------------------------------------------------------------------------------------------------------------------------------------------------------------------------------------------------------------------------------------------------------------------------------------------------------------------------------|-----------------------------------------------------------------------------------------------------------------------------------------------------------------------------------------------------------------------------------------------------|
|                                                   | topographic features<br>geological formation<br>mountain range<br>watershed geography<br>groundwater level<br>lakes within region<br>surface water availability<br>groundwater availability<br>inland water bodies<br>soil water-holding capacity                                                                                                                                                                              |                                                                                                                                                                                                                                                     |
| <b>Sociodemographics</b>                          | total population<br>population density<br>human displacement<br>literacy rate<br>education expenditure and skilled people<br>net migration<br>gender<br>social status<br>social networks<br>beliefs and values<br>equity                                                                                                                                                                                                       | Who are the most vulnerable groups, specific to the location of the study and hazard?<br><br>Why are those people vulnerable?                                                                                                                       |
| Health                                            | restricted mobility/disability<br>life expectancy at birth<br>prevalence of anemia among children<br>disease prevalence<br>mortality rate under -5<br>prevalence of HIV<br>health status (alcohol and substance use)<br>mental health<br>maternal mortality ratio                                                                                                                                                              | What health characteristics increase risks associated with drought?                                                                                                                                                                                 |
| <b>Economic context, capacity and livelihoods</b> | economic welfare (GDP or GNI per capita)<br>inflation/consumer prices<br>expenditure<br>market fragility<br>consumption<br>unemployment rate of population<br>health expenditure per capita<br>socioeconomic relevance of industry<br>access to credits and loans<br>labor force<br>investments<br>access to markets<br>mobile cellular subscriptions<br>problematic debt<br>taxes<br>economic and financial resources (labor) | How do the economic conditions of the country(ies) (e.g. GNI, GDP, unemployment rate, market access, inflation) affect the ability of people to cope with the drought?<br><br>How does the drought impact key economic sectors in the country(ies)? |

|                      |                                                                                                                                                                                                                                                                                                                                                                                                                                                                                                                                                                                                                                                                                                                                                                                                                                                                                                                                                                                               |                                                                                                                                                                                                                                                                                                                                                                                                                                                                                             |
|----------------------|-----------------------------------------------------------------------------------------------------------------------------------------------------------------------------------------------------------------------------------------------------------------------------------------------------------------------------------------------------------------------------------------------------------------------------------------------------------------------------------------------------------------------------------------------------------------------------------------------------------------------------------------------------------------------------------------------------------------------------------------------------------------------------------------------------------------------------------------------------------------------------------------------------------------------------------------------------------------------------------------------|---------------------------------------------------------------------------------------------------------------------------------------------------------------------------------------------------------------------------------------------------------------------------------------------------------------------------------------------------------------------------------------------------------------------------------------------------------------------------------------------|
|                      | number of land holdings<br>innovation capacity<br>inability to finance loss<br>tourism                                                                                                                                                                                                                                                                                                                                                                                                                                                                                                                                                                                                                                                                                                                                                                                                                                                                                                        |                                                                                                                                                                                                                                                                                                                                                                                                                                                                                             |
| <b>Agriculture</b>   | agricultural occupation<br>multiple-crop index (%)<br>double cropping index (%)<br>aspects of agricultural innovation<br>being irrigated or rain-fed farmer<br>cultivation pattern (sowing once a year<br>to twice a year)<br>fixed capital (yuan/farmer)<br>irrigated or non irrigated agriculture<br>cropland<br>dry farming<br>field size<br>fishery poll<br>improved seeds<br>pasture land<br>permanent irrigated agriculture<br>probability of seasonal crop moisture<br>deficiency (%)<br>productivity<br>using drought resistance varieties<br>agr electricity supply (kWh)<br>agricultural area<br>agricultural machinery<br>animal<br>arable land<br>agricultural water use<br>soil type<br>irrigation water withdrawals<br>range land<br>the effective irrigation rate (%)<br>irrigation method<br>fraction of crop land use<br>fodder type<br>rain-fed crops<br>fertilizer rate<br>pesticide use<br>soil condition and quality<br>(degradation/desertification)<br>diversification | <p>What drought-related risks do agricultural workers, farmers and/or pastoralists in the affected areas face? (e.g. labor productivity loss, crop/livestock loss, etc.)?</p> <p>How have farmers and pastoralists responded to the drought? (e.g. crop rotation, mixed cropping, using adaptive planting calendar in response to weather patterns, harvesting water run-off for irrigation etc.)</p> <p>What are the land and agricultural management practices? Are they sustainable?</p> |
| <b>Food security</b> | prevalence of undernourishment<br>malnutrition<br>GDP in agriculture (yuan/capita)<br>price of agricultural commodities<br>farmer income<br>food production<br>food security (agricultural value<br>added/GDP)<br>assistance (availability of food aid)                                                                                                                                                                                                                                                                                                                                                                                                                                                                                                                                                                                                                                                                                                                                       | <p>What are the vulnerabilities of the food production system itself (e.g. crop yield and quality losses, pollinator health, overall food security concerns)?</p> <p>Are there cascading impacts on food security?</p>                                                                                                                                                                                                                                                                      |



|                                      |                                                                                                                                                                                                                                                                                                                                                                                                                                                               |                                                                                                                                                                                                                                                                                                                                                                                                                                                                                                  |
|--------------------------------------|---------------------------------------------------------------------------------------------------------------------------------------------------------------------------------------------------------------------------------------------------------------------------------------------------------------------------------------------------------------------------------------------------------------------------------------------------------------|--------------------------------------------------------------------------------------------------------------------------------------------------------------------------------------------------------------------------------------------------------------------------------------------------------------------------------------------------------------------------------------------------------------------------------------------------------------------------------------------------|
|                                      | livestock health condition                                                                                                                                                                                                                                                                                                                                                                                                                                    |                                                                                                                                                                                                                                                                                                                                                                                                                                                                                                  |
| Rural-urban interface                | urban land<br>fraction of urban area<br>urbanization rate (%)<br>pressure on resources (population density)<br>ratio of rural to urban population<br>rural population<br>human habitation                                                                                                                                                                                                                                                                     | What is the connection between rural and urban areas affected by drought? (e.g. migration, resource competition, depopulation etc.)                                                                                                                                                                                                                                                                                                                                                              |
| Land cover and ecological condition  | aquatic ecosystem status<br>bare lands<br>biodiversity<br>barren/waste land<br>natural resource structure<br>artificial surfaces<br>well yield capacity<br>woodland range<br>protection and conservation (protected areas)<br>wetland<br>forest coverage rate (%)<br>semi natural area<br>vegetation<br>scrub                                                                                                                                                 | How are land-use practices, changes, or environmental degradation exacerbating or alleviating drought conditions?<br><br>Are soil pollution, erosion, water contamination, and saltwater intrusions an issue in the region? Is drought exacerbating these?<br><br>Are soil pollution, erosion, water contamination, and saltwater intrusions an issue in the region? Is drought exacerbating these?<br><br>What is the status of biodiversity in the region and is this impacted by the drought? |
| <b>Critical systems and services</b> | availability and quality of infrastructure<br>technology<br>qanat discharge<br>remoteness (rural/remote populations)<br>rail density (km/km2)<br>improved sanitation facilities                                                                                                                                                                                                                                                                               | Were critical systems (e.g. water, energy, transport, infrastructure) and services built to withstand this event? Elaborate by type of system or service.                                                                                                                                                                                                                                                                                                                                        |
| Water and energy systems             | access to electricity<br>energy<br>water and sanitation<br>reservoirs<br>safe water<br>total water use (% of renewable)<br>water availability<br>water tanks<br>water use by industry<br>potential loss<br>municipal water withdrawal<br>actual domestic water consumption<br>actual irrigation water consumption<br>availability and utilization of ground water and the extent of water resources development in the region<br>dams + groundwater resources | Are the water and electricity systems able to respond to demand?<br><br>How has the drought impacted power generation?<br><br>Are the hydroelectric dams functioning at capacity?<br><br>Are coal power plants receiving the coal despite lower river levels?<br><br>Are nuclear power plants able to cool down their systems?<br>Are energy systems able to respond to the extreme heat commonly associated with drought (including the shocks of (i) direct                                    |

|                                |                                                                                                                                                                                                                                                                                                                                    |                                                                                                                                                                                                                                                                                                                                                                                                                                                                                                                                                                                                                                                                                                                                                                                              |
|--------------------------------|------------------------------------------------------------------------------------------------------------------------------------------------------------------------------------------------------------------------------------------------------------------------------------------------------------------------------------|----------------------------------------------------------------------------------------------------------------------------------------------------------------------------------------------------------------------------------------------------------------------------------------------------------------------------------------------------------------------------------------------------------------------------------------------------------------------------------------------------------------------------------------------------------------------------------------------------------------------------------------------------------------------------------------------------------------------------------------------------------------------------------------------|
|                                | dams capacity<br>distance from water resources<br>population with access to safe drinking water<br>public water supply infrastructure<br>renewable internal fresh water resources<br>total renewable water resources per capita<br>water demand/utilization<br>water resources development<br>share of municipal water consumption | heat exposure, and (ii) cooling-driven spikes in energy demand)?<br><br>What is the state of the surface and groundwater resources? How do households access these?<br>Have they been overexploited?<br><br>What are the water consumption habits of the area? Are these sustainable in normal conditions? What about during drought years?<br><br>Is there evidence of high water wastage in public supply systems?<br><br>Has population and water demand increased recently?<br><br>What is the age of the existing water management system and is it efficient? Can it deal with recurring droughts?<br><br>What populations do they serve? What are the main sources of water? What type of infrastructure is present? When were the systems developed and when were they last updated? |
| <b>Drought risk management</b> |                                                                                                                                                                                                                                                                                                                                    |                                                                                                                                                                                                                                                                                                                                                                                                                                                                                                                                                                                                                                                                                                                                                                                              |
| Governance                     | governance<br>lack of trust in institutions<br>political representation<br>public participation<br>institutional coordination<br>participating in local institutions<br>government presence or programs<br>decision making<br>war and conflict                                                                                     | Which agencies are responsible for managing drought risk?<br><br>How are they coordinating with each other? Are there governance challenges?<br><br>Does the country/region have transboundary water resources? If yes, how are those water resources managed?                                                                                                                                                                                                                                                                                                                                                                                                                                                                                                                               |
| Policies and plans             | environmental taxes<br>communications<br>governmental programs<br>river basin management plans<br>drought management tools<br>land tenure system                                                                                                                                                                                   | What policies, programmes, and other initiatives are in place to reduce risk and impacts (e.g. land, resource, water management, deforestation)?<br><br>Are there any trade-offs or gaps in drought policy?                                                                                                                                                                                                                                                                                                                                                                                                                                                                                                                                                                                  |
| Early warning and early action | drought awareness and information<br>access to information sources<br>early warning                                                                                                                                                                                                                                                | Does the region have a functional drought or food security early warning system?                                                                                                                                                                                                                                                                                                                                                                                                                                                                                                                                                                                                                                                                                                             |

|                                           |                                                                                                                                                                                                                                                         |                                                                                                                                                                                                                                                                                                                                                                                                                                                                                                                                                                                                                                                 |
|-------------------------------------------|---------------------------------------------------------------------------------------------------------------------------------------------------------------------------------------------------------------------------------------------------------|-------------------------------------------------------------------------------------------------------------------------------------------------------------------------------------------------------------------------------------------------------------------------------------------------------------------------------------------------------------------------------------------------------------------------------------------------------------------------------------------------------------------------------------------------------------------------------------------------------------------------------------------------|
|                                           | underestimation of drought risk                                                                                                                                                                                                                         | <p>Was this drought/food insecurity forecasted? If so, with what lead time, accuracy, etc.?</p> <p>Were there internal government and/or public warnings of the drought?</p> <p>Was early action taken before the forecasted drought to build capacity and preparedness (e.g. training, awareness raising campaigns)?</p> <p>If so, what do we know about who can access the information; are there any gaps and other challenges?</p>                                                                                                                                                                                                          |
| Emergency response                        | drought recovery capacity<br>war and conflict                                                                                                                                                                                                           | <p>What response was prompted by government and city authorities?</p> <p>How resilient are management practices to address prolonged drought conditions? What best practices are used to increase this resilience?</p> <p>Are there examples of maladaptation?</p>                                                                                                                                                                                                                                                                                                                                                                              |
| Individual and household coping behaviors | human and civic resources<br>savings<br>self-coping<br>assets<br>access to resources<br>risk taking behavior<br>social networks<br>non-agricultural incomes<br>access to information<br>dependence on government help<br>indigenous and local knowledge | <p>How do individual households cope with drought, considering differences between households based on sociodemographic or economic status?</p> <p>Does livelihood diversification help buffer against some of the drought shocks?</p> <p>Does social capital (e.g. social networks, informal insurance schemes, a bartering economy, etc) help mitigate drought impacts on vulnerable households?</p> <p>Have various types of migration (e.g. transhumance, seasonal migration, rural-urban migration, managed retreat) been used to cope with the drought?</p> <p>How did people's risk perception support or dissuade coping behaviors?</p> |
| Insurance and social protection           | drought insurance<br>health insurance<br>agricultural insurance                                                                                                                                                                                         | <p>Are any insurance schemes in place or planned?</p> <p>Are there known gaps or barriers to accessing existing schemes?</p>                                                                                                                                                                                                                                                                                                                                                                                                                                                                                                                    |

# Wildfires

| Key Themes                                | Factors                                                                                                                                                                                                                                                        | Guiding questions                                                                                                                                                                                                                                                                                                                                                      |
|-------------------------------------------|----------------------------------------------------------------------------------------------------------------------------------------------------------------------------------------------------------------------------------------------------------------|------------------------------------------------------------------------------------------------------------------------------------------------------------------------------------------------------------------------------------------------------------------------------------------------------------------------------------------------------------------------|
| <b>Hazard characteristics and impacts</b> | fire frequency<br>fire intensity<br>heat release<br>ecological impacts                                                                                                                                                                                         | What are the characteristics of the fires (timing, location, intensity, length,)?<br><br>What was the cause (spark) of the fires?<br><br>How do the impacts compare to similar hazards experienced in the past?<br><br>Are there any compounding or cascading impacts (e.g. on food security)?<br><br>Are there existing fire risk maps for the location of the study? |
| <b>Landscape and fuel availability</b>    | forest<br>vegetation structure<br>main/secondary ground covering<br>reproductive strategy of vegetation<br>terrain slope<br>elevation<br>overhanging trees<br>potential leaf accumulation on roof/gutters                                                      | How does the landscape and fuel availability influence the size, intensity and spread of the fire?                                                                                                                                                                                                                                                                     |
| Ecological condition                      | ecological environment quality<br>ecological regeneration delay (soil erosion potential<br>habitat fragmentation<br>soil loss<br>threatened species<br>biodiversity richness<br>mortality rate or survival response of species                                 | What is the ecological condition of the place at risk? How ecologically sensitive is this location to wildfire?                                                                                                                                                                                                                                                        |
| <b>Sociodemographics</b>                  | citizenship<br>education<br>ethnicity<br>total number of households<br>age<br>female % in labor force<br>female-headed HH<br>gender<br>single parent households<br>sex<br>community dynamics (cohesion)<br>culture<br>class<br>values & perception<br>minority | Who are the most vulnerable groups, specific to the location of the study?<br><br>Why are those people vulnerable?                                                                                                                                                                                                                                                     |

|                                 |                                                                                                                                                                                                                                                                                                                                         |                                                                                                                                                                                                                                 |
|---------------------------------|-----------------------------------------------------------------------------------------------------------------------------------------------------------------------------------------------------------------------------------------------------------------------------------------------------------------------------------------|---------------------------------------------------------------------------------------------------------------------------------------------------------------------------------------------------------------------------------|
|                                 | place dependency (economic: natural resource dependency / noneconomic: dependence on local social networks and identity-based place attachment)<br>receiving social security<br>employment status<br>financial/social capital<br>land tenure                                                                                            |                                                                                                                                                                                                                                 |
| Health and air pollution        | chronic obstructive pulmonary disease<br>health/abilities<br>county prevalence rates for diabetes<br>hypertension<br>mental and physical health                                                                                                                                                                                         | How is the wildfire impacting air quality? If air quality is poor, what are the knock on effects? (e.g. health impacts, closure of schools etc.)<br><br>Are people with pre-existing medical conditions predominantly affected? |
| <b>Wildland-urban interface</b> | location<br>directly/indirectly exposed<br>size of wildlife urban interface<br>coupling of ecology and urbanization<br>land-use<br>values of houses in the wildland-urban interface<br>urban development<br>rapid growth<br>nursing facility                                                                                            | Who and what is located at the wildland-urban interface? How has this changed over time?<br>What factors are driving the changes?                                                                                               |
| Built environment               | number of multi-family residential units<br>overcrowding<br>ownership<br>mobile homes<br>multi-unit housing<br>number of manufactured housing units<br>recreation<br>unoccupied housing<br>people living in group quarters<br>land value<br>house/land market<br>rent<br>percentage unoccupied housing units<br>neighbouring structures | How does the built environment increase or reduce wildfire risk?                                                                                                                                                                |
| Structures                      | roof type<br>type of shutter<br>building age<br>structure type<br>ground floor<br>number of floors<br>number of acres in property                                                                                                                                                                                                       | How do the characteristics of the structures (e.g. roof type, shutter type, number of floors) impact their susceptibility to be burned?                                                                                         |
| <b>Wildfire risk management</b> |                                                                                                                                                                                                                                                                                                                                         |                                                                                                                                                                                                                                 |

|                              |                                                                                                                                            |                                                                                                                                                                                                                                                                                                                                                                                                                                                                                                                                                                                                   |
|------------------------------|--------------------------------------------------------------------------------------------------------------------------------------------|---------------------------------------------------------------------------------------------------------------------------------------------------------------------------------------------------------------------------------------------------------------------------------------------------------------------------------------------------------------------------------------------------------------------------------------------------------------------------------------------------------------------------------------------------------------------------------------------------|
| Governance                   | governance<br>trust in government<br>taxation opposition                                                                                   | Which agencies are responsible for managing fire risk?<br><br>How are they coordinating with each other?<br>Are there governance challenges?                                                                                                                                                                                                                                                                                                                                                                                                                                                      |
| Policies and plans           | perceived vegetation risk<br>disaster relief subsidies<br>fuels management<br>property regulation<br>zoning/codes<br>agency fuel reduction | What is the wildfire legislation landscape in the country/region?<br><br>Are there standards, regulations or policies that pertain to fire in the region? Were those being enforced?<br><br>What measures are taken to mitigate air pollution and protect human health?<br><br>What are the land and fuel management practices?                                                                                                                                                                                                                                                                   |
| Prevention                   | individual and community hazard preparation<br>perceived structure risk                                                                    | Does the region have a functioning early warning system/early fire detection system?<br><br>Does the region have fire risk management procedures, guidelines, and contingency plans in place? What actions were implemented to mitigate risk? (e.g. bush reduction, manual removal of undergrowth, controlled burning, etc.)<br><br>Have long-term changes in land-use or forest management played a role?<br><br>What positive or negative coping strategies are being used at the individual and household level?<br><br>How did people's risk perception support or dissuade coping behaviors? |
| Detection and communication  | warning time length                                                                                                                        | Were there internal government and/or public warnings of the fires? If so, what do we know about who can access the information, are there any gaps and other challenges?                                                                                                                                                                                                                                                                                                                                                                                                                         |
| Protection                   | number of exits from fireprone areas<br>no vehicle                                                                                         | What was done to facilitate occupant avoidance of and escape from the effects of fire?<br><br>What response activities were conducted?                                                                                                                                                                                                                                                                                                                                                                                                                                                            |
| Containment & extinguishment | firefighting institutions<br>response plans                                                                                                | Was it possible to extinguish the wildfires?                                                                                                                                                                                                                                                                                                                                                                                                                                                                                                                                                      |

|           |                                                                        |                                                                                                                                                            |
|-----------|------------------------------------------------------------------------|------------------------------------------------------------------------------------------------------------------------------------------------------------|
|           | water availability<br>municipal water supply<br>housing/transportation | What containment actions were taken?<br><br>Was there international coordination involved in containment activities (e.g. shared fire fighting resources)? |
| Insurance | fire insurance                                                         | What is the prevalence and quality of fire insurance in the area burned?                                                                                   |

## Floods

| Key Themes                                | Factors                                                                                                                                                                                                                                                                    | Guiding questions                                                                                                                                                                                                                                                                                                                                                                                                                                                                |
|-------------------------------------------|----------------------------------------------------------------------------------------------------------------------------------------------------------------------------------------------------------------------------------------------------------------------------|----------------------------------------------------------------------------------------------------------------------------------------------------------------------------------------------------------------------------------------------------------------------------------------------------------------------------------------------------------------------------------------------------------------------------------------------------------------------------------|
| <b>Hazard characteristics and impacts</b> | depth of flood water<br>number of floods<br>time of occurrence<br>ephemeral streams                                                                                                                                                                                        | What are the key hazard characteristics of the flood? (ie. timing, location, intensity)<br><br>What flood-related impacts are known in the affected area? (mortality, morbidity, asset destruction, key sectoral impacts and infrastructure impacts)<br><br>How do the impacts reported to date compare to similar floods experienced in the past?<br><br>Do flood extent maps or flood risk maps exist?<br><br>Are there any compounding or cascading impacts (e.g. on health)? |
| Geophysical                               | topography (low-lying, slope)<br>hydrogeological characteristics of stream<br>snowmelt areas<br>soil characteristics<br>river network shrinkage<br>surface and groundwater features<br>sea level rise<br>siltation of channel beds<br>riverbank erosion<br>land subsidence | What are the topographic and hydrologic characteristics of the affected area?                                                                                                                                                                                                                                                                                                                                                                                                    |
| <b>Sociodemographics</b>                  | gender<br>age<br>household composition and size<br>household headed by female<br>percentage of single-parent households<br>language<br>ethnic minorities                                                                                                                   | What is the HDI value(s) of the affected area?<br><br>Who are the most vulnerable groups in the affected area? Why are they vulnerable?<br><br>Has there been migration and displacement in the region that adds an additional stressor to the                                                                                                                                                                                                                                   |

|                                                           |                                                                                                                                                                                                                                                                                                                                                      |                                                                                                                                                                                                                                                                                                                           |
|-----------------------------------------------------------|------------------------------------------------------------------------------------------------------------------------------------------------------------------------------------------------------------------------------------------------------------------------------------------------------------------------------------------------------|---------------------------------------------------------------------------------------------------------------------------------------------------------------------------------------------------------------------------------------------------------------------------------------------------------------------------|
|                                                           | foreigners, migrants,<br>immigrants, tourists, refugees<br>literacy rate<br>housing and land tenure<br>renting<br>personality traits<br>swimming ability<br>ability to self-cope<br>wealth<br>local social integration<br>social cohesion<br>poor community support<br>well-being                                                                    | region, and/or is the flood/storm a reason for<br>migration and displacement?                                                                                                                                                                                                                                             |
| Health                                                    | household member with illness<br>disability<br>care treatment<br>mental state<br>health<br>physical condition of individuals<br>sensory impairment<br>evacuation ability                                                                                                                                                                             | Were people with physiological risk factors<br>disproportionately impacted during the floods (ex.<br>people with mobility or sensory impairments)?                                                                                                                                                                        |
| Cultural or systemic                                      | clothing type<br>cultural heritage<br>beliefs and customs<br>religion<br>social awareness rate<br>cultural assets<br>cultural vision of disasters<br>racial fragmentation of areas<br>racial social system<br>social inequities<br>rural urban migration                                                                                             | Are there relevant cultural influences that may<br>have exacerbated or decreased flood impacts?<br><br>Are there relevant historic<br>processes/policies/events influencing vulnerability<br>and exposure, such as systematic exclusion,<br>conflict, political instability, and colonialism?                             |
| <b>Economic context,<br/>capacity and<br/>livelihoods</b> | GDP per capita<br>perceived adverse effect on<br>finances<br>profession (level of accessibility<br>to higher-paying or more secure<br>occupations)<br>disruption of people's<br>livelihoods<br>limited access to assets<br>asset concentration<br>job security<br>unemployment rate<br>average income<br>industries and other economic<br>activities | How do the economic conditions of the<br>country(ies) (e.g. GDP, unemployment rate,<br>income) affect the ability of people to cope with<br>the floods?<br><br>What are the predominant industries and<br>livelihoods in the affected area? Are some<br>industries or livelihoods more or less impacted by<br>the floods? |
| <b>Spatial planning and<br/>exposure</b>                  | location<br>river confluence<br>coastal proximity                                                                                                                                                                                                                                                                                                    | Were any urban areas affected?                                                                                                                                                                                                                                                                                            |



|                               |                                                                                                                                                                                                                                                                                                                                                                                                                                                                                                                                                                                                                                                                                                                                                                                        |                                                                                                                                                                                                                                                       |
|-------------------------------|----------------------------------------------------------------------------------------------------------------------------------------------------------------------------------------------------------------------------------------------------------------------------------------------------------------------------------------------------------------------------------------------------------------------------------------------------------------------------------------------------------------------------------------------------------------------------------------------------------------------------------------------------------------------------------------------------------------------------------------------------------------------------------------|-------------------------------------------------------------------------------------------------------------------------------------------------------------------------------------------------------------------------------------------------------|
|                               | <p>poor natural drainage in flood-prone areas</p> <p>population density</p> <p>population growth</p> <p>settlement patterns</p> <p>overpopulation</p> <p>neighborhood characteristics</p> <p>number of dwellings located at flood prone area</p> <p>encroachment zones</p> <p>residency in temporary accommodations</p> <p>squatter settlements</p> <p>place of settlement</p> <p>river basin settlements</p> <p>floodplain development</p> <p>obstructed floodplains</p> <p>encroachment zones</p> <p>marginal lands</p> <p>location of housing</p> <p>human occupation of land</p> <p>urban and industrial expansion</p> <p>physical structures and infrastructure located in hazard-prone areas</p> <p>urban area, sprawl</p> <p>rapid urbanization</p> <p>development pressure</p> | <p>If yes, how is the urban planning of the affected area either exacerbating or helping to reduce flood risk, intentionally or unintentionally?</p>                                                                                                  |
| Shelter (formal and informal) | <p>two or more stories above ground level</p> <p>age of construction</p> <p>building type</p> <p>building design</p> <p>age and quality of construction</p> <p>physical conditions of the building</p> <p>position of the building in relation to the ground level</p> <p>timber framed buildings</p> <p>construction code</p> <p>construction materials</p> <p>number of storeys</p> <p>presence of air-bricks vents and ducts</p> <p>adjacency to other buildings</p> <p>type of shelter (flat/bungalow/caravan)</p> <p>rented houses</p> <p>substandard housing</p> <p>windows on underground level</p> <p>mobile home or</p> <p>camp and car</p> <p>tents</p> <p>including settlement conditions</p>                                                                               | <p>What types of shelter exist in the affected areas?</p> <p>What are the disproportionate effects by shelter type, if any?</p> <p>Are there informal settlements in the affected area?</p> <p>Do building codes adequately consider flood risks?</p> |

|                                       |                                                                                                                                                                                                                                                                                                                                                                                                                                                                                                                                                                                                                                                           |                                                                                                                                                                                                                                                                                                                                                                                                                                                                                                                                                              |
|---------------------------------------|-----------------------------------------------------------------------------------------------------------------------------------------------------------------------------------------------------------------------------------------------------------------------------------------------------------------------------------------------------------------------------------------------------------------------------------------------------------------------------------------------------------------------------------------------------------------------------------------------------------------------------------------------------------|--------------------------------------------------------------------------------------------------------------------------------------------------------------------------------------------------------------------------------------------------------------------------------------------------------------------------------------------------------------------------------------------------------------------------------------------------------------------------------------------------------------------------------------------------------------|
|                                       | land tenure<br>basement flood mitigation technologies<br>percentage of home rented/owned<br>property ownership (owner)<br>cellar ownership                                                                                                                                                                                                                                                                                                                                                                                                                                                                                                                |                                                                                                                                                                                                                                                                                                                                                                                                                                                                                                                                                              |
| <b>Land-use and land cover change</b> | amount of vegetated cover<br>agricultural encroachment<br>coastal development<br>low infiltration capacity<br>land-use planning<br>reduced retention<br>vegetation cover and agricultural productivity<br>land use change<br>land degradation<br>land reclamation<br>land subsidence<br>deterioration of wetland<br>deforestation<br>rapid socioenvironmental changes<br>amount of vegetated cover<br>impervious surfaces<br>industrial facility density<br>level of development<br>service and commercial facility density<br>poor spatial planning<br>land distribution<br>zoning regulation<br>encroachment zones<br>green spaces/urban green coverage | <p>Have any land-use changes or practices increased or reduced the flood risk in the affected area (e.g. decreased natural areas, loss or encroachment of water bodies, deforestation, etc)?</p> <p>What types of land policy has been conducted in the region? Is there evidence of land expropriation?</p> <p>Have there been national or regional level land-reform policies that may exacerbate or alleviate the impacts of floods?</p> <p>What policies, programmes, and other initiatives are put in place to reduce and prevent negative impacts?</p> |
| <b>Critical systems and services</b>  | households without electricity<br>households without safe water<br>drainage network/pipelines<br>density<br>number of hospitals<br>consuming public water supply<br>road density<br>condition of roads<br>location of bridges<br>age of construction<br>construction of infrastructure<br>quality of infrastructure<br>exposure of critical facilities<br>poor waste management<br>poor sanitation management<br>stormwater overloading                                                                                                                                                                                                                   | <p>Were critical systems (e.g. water, energy, transport, infrastructure) and services built to withstand this event? Elaborate by type of system or service.</p>                                                                                                                                                                                                                                                                                                                                                                                             |

| Flood risk management          |                                                                                                                                                                                                                                                                                                |                                                                                                                                                                                                                                                                                                                                                                                                                                              |
|--------------------------------|------------------------------------------------------------------------------------------------------------------------------------------------------------------------------------------------------------------------------------------------------------------------------------------------|----------------------------------------------------------------------------------------------------------------------------------------------------------------------------------------------------------------------------------------------------------------------------------------------------------------------------------------------------------------------------------------------------------------------------------------------|
| Governance                     | institutional coordination<br>capacity<br>enforcement and inspection<br>authority and capabilities<br>governance aspects<br>political context<br>public expenditure cuts<br>social power and capacity to make decisions<br>trust in officials<br>Flood policy<br>municipality planning gaps    | <p>Which agencies are responsible for managing flood risk?</p> <p>How are they coordinating with each other? Are there governance challenges?</p> <p>Does the country/region have transboundary rivers? If yes, how are those water resources managed?</p>                                                                                                                                                                                   |
| Policies and plans             | channel modification<br>dike construction<br>irrigation breaches<br>river engineering<br>water conservation<br>weakness of flood reduction structures<br>stormwater and wastewater management systems<br>weak flood control systems<br>knowledge-based flood management<br>drainage facilities | <p>What flood risk management policies exist, across spatial and temporal scales? Are they enforced?</p> <p>Have flood protection measures been implemented in the region (e.g. coastal defenses, dams, diversion canals, wetlands)? Are there examples of maladaptation?</p> <p>Are there examples of maladaptation?</p> <p>Are there any limits to adaptation, hard or soft?</p>                                                           |
| Early warning and early action | lack of EWS and warning time<br>hydrological forecast<br>flood warning attitude<br>dependency on public infrastructure<br>precautionary measures<br>preparedness of community<br>public awareness of risks<br>data availability                                                                | <p>Does the region have a functional flood early warning system?</p> <p>Was the event forecasted? If so, with what lead time, accuracy, etc?</p> <p>Were there internal government and/or public warnings of the storm/flood? If so, what do we know about who can access the information, are there any gaps and other challenges?</p> <p>Were any anticipatory actions rolled out pre-onset, or before the bulk of impacts manifested?</p> |
| Emergency response             | reaction strategy<br>number of shelter<br>evacuation routes, no sign or alarms on the road<br>response and relief (response to warning)<br>supportive and emergency jobs<br>warning and emergency actions<br>distance between disaster related facilities and those in need                    | <p>Did the government declare a state of emergency or equivalent?</p> <p>What response actions were taken by the government, city authorities or implementing partners?</p>                                                                                                                                                                                                                                                                  |

|                                           |                                                                                                                                                                                                                                                                                                                                                                                                                                                                                                                 |                                                                                                                                                                                                          |
|-------------------------------------------|-----------------------------------------------------------------------------------------------------------------------------------------------------------------------------------------------------------------------------------------------------------------------------------------------------------------------------------------------------------------------------------------------------------------------------------------------------------------------------------------------------------------|----------------------------------------------------------------------------------------------------------------------------------------------------------------------------------------------------------|
|                                           | emergency committee<br>emergency services<br>trapped in building<br>barricade dangerous roads<br>poor road light<br>vehicle use (type, occupancy)                                                                                                                                                                                                                                                                                                                                                               |                                                                                                                                                                                                          |
| Individual and household coping behaviors | low level of community knowledge<br>knowledge about flooded area<br>direct disaster experience<br>prolonged recovery<br>risk perception and approach<br>way people react and behavior (high risk behavior)<br>Household: available time and energy<br>Population's adaptive capacity<br>personality traits<br>swimming ability<br>ability to self-cope<br>intoxication<br>occupant behavior<br>experience with mobility in water<br>walking or entering into floodwaters<br>access to information and knowledge | What positive or negative coping strategies are being used at the individual and household level?<br><br>How did people's risk perception support or dissuade coping behaviors?                          |
| Insurance and social protection           | resource inaccessibility<br>availability of fundamental amenities<br>risk insurance<br>flood insurance                                                                                                                                                                                                                                                                                                                                                                                                          | Are there shock-responsive social protection programmes that have been scaled up or out during the event?<br><br>Is flood insurance a significant factor in the recovery strategy for the affected area? |

## Storms

| Key Themes                                | Factors                                                                                                                                                                     | Guiding questions                                                                                                                                                                                                                                                                                                                                                       |
|-------------------------------------------|-----------------------------------------------------------------------------------------------------------------------------------------------------------------------------|-------------------------------------------------------------------------------------------------------------------------------------------------------------------------------------------------------------------------------------------------------------------------------------------------------------------------------------------------------------------------|
| <b>Hazard characteristics and impacts</b> | floods<br>high wind zones<br>temperature<br>increased storm strength<br>pre-storm depression<br>storm surges<br>flood penetration<br>river discharge<br>saltwater intrusion | What are the key hazard characteristics of the storm? (ie. timing, location, track, intensity)<br><br>What wind, flood and storm surge-related impacts are known in the affected area? (mortality, morbidity, infrastructure damage, damage to public and private sector)<br><br>How do the impacts reported to date compare to similar storms experienced in the past? |

|                          |                                                                                                                                                                                                                                                                                                                                                                                                                                                                      |                                                                                                                                                                                                                                                                                                                            |
|--------------------------|----------------------------------------------------------------------------------------------------------------------------------------------------------------------------------------------------------------------------------------------------------------------------------------------------------------------------------------------------------------------------------------------------------------------------------------------------------------------|----------------------------------------------------------------------------------------------------------------------------------------------------------------------------------------------------------------------------------------------------------------------------------------------------------------------------|
|                          |                                                                                                                                                                                                                                                                                                                                                                                                                                                                      | <p>Do flood extent or risk maps exist?</p> <p>Are there any compounding or cascading impacts (e.g. on health)?</p> <p>What is the cost of the damages as a proportion of GDP?</p>                                                                                                                                          |
| Storm surge              | coastal slope<br>sea-level rise<br>geomorphology<br>tectonic & land subsidence<br>high wave-energy exposure<br>inundation-prone areas,<br>urban bowl topography<br>population at risk due to sea level rise<br>lack of natural buffers<br>port activity                                                                                                                                                                                                              | <p>Was there a storm surge related to the event? Why or why not?</p> <p>If so, what factors increased or reduced the damage from the storm surge?</p>                                                                                                                                                                      |
| <b>Sociodemographics</b> | population growth<br>socioeconomic inequality<br>increased number of children in single household<br>nationality<br>non-English speakers<br>race<br>refugees<br>life expectancy at birth<br>low technological access<br>displaced populations<br>literacy<br>gender<br>age<br>pregnancy<br>single-mother households<br>cultural heritage<br>ideologie<br>people living alone<br>weak social networks<br>dependence on public aid<br>housing insecurity<br>GINI index | <p>What is the HDI value(s) of the affected area?</p> <p>Who are the most vulnerable groups in the affected area? Why are they vulnerable?</p> <p>Has there been migration and displacement in the region that adds an additional stressor to the region, and/or is the storm a reason for migration and displacement?</p> |
| Health                   | people with chronic illness (cancer)<br>hypertension<br>immunocompromised<br>prior psychiatric history<br>respiratory illness<br>end stage renal disease<br>substance abuse and smoking<br>AIDS<br>cardiovascular disease                                                                                                                                                                                                                                            | <p>Were people with adverse health conditions disproportionately impacted by the storm? Why or why not?</p> <p>Is there potential for long-term health impacts as a result of the damage from the storm (e.g. psychosocial, as a result of contaminated drinking water or reduced healthcare system capacity)?</p>         |

|                                          |                                                                                                                                                                                                                                                                                                                                                                                                                                                                                                                                                        |                                                                                                                                                                                                                                                                                                                           |
|------------------------------------------|--------------------------------------------------------------------------------------------------------------------------------------------------------------------------------------------------------------------------------------------------------------------------------------------------------------------------------------------------------------------------------------------------------------------------------------------------------------------------------------------------------------------------------------------------------|---------------------------------------------------------------------------------------------------------------------------------------------------------------------------------------------------------------------------------------------------------------------------------------------------------------------------|
|                                          | <p>education</p> <p>health physical/mental</p> <p>patients who rely on electrically powered medical equipment</p> <p>access to healthcare</p> <p>private health expenditure</p> <p>number of hospital beds per 10</p>                                                                                                                                                                                                                                                                                                                                  |                                                                                                                                                                                                                                                                                                                           |
| <b>Economic capacity and livelihoods</b> | <p>agricultural dependency</p> <p>increased asset concentration</p> <p>industry</p> <p>local investments</p> <p>economic fragility</p> <p>resources</p> <p>tourist season</p> <p>economic standing</p> <p>livelihood at risk</p> <p>local economy</p> <p>low-income levels and social relations</p> <p>debt repayment schedules</p> <p>local market</p>                                                                                                                                                                                                | <p>What are the predominant industries and livelihoods in the affected area? Are some industries and livelihoods more or less impacted by the storm?</p>                                                                                                                                                                  |
| <b>Spatial planning and exposure</b>     | <p>rapid urbanization and population growth</p> <p>settlement in floodplains</p> <p>coastal urbanization and migration</p> <p>poor land use planning</p> <p>unregulated coastal development</p> <p>inadequate building codes</p> <p>inadequate infrastructure</p> <p>river flow regulation</p> <p>set-back zones (coastal development)</p> <p>exposure of critical assets</p> <p>debris-filled environments</p> <p>engineered frontage</p> <p>physical infrastructure</p> <p>high-value infrastructure</p> <p>dense infrastructure</p> <p>exposure</p> | <p>Are there relevant historic processes/policies/events influencing exposure, such as systematic exclusion?</p> <p>How is the spatial planning of the affected areas either exacerbating or helping to reduce flood risk, intentionally or unintentionally?</p> <p>What do we know about future spatial plans?</p>       |
| Land-use changes                         | <p>land use land cover change</p> <p>natural protection</p> <p>degradation</p> <p>sediment supply limitations</p> <p>subsidence</p> <p>intensive agriculture/aquaculture</p> <p>wetland loss</p> <p>deforestation</p>                                                                                                                                                                                                                                                                                                                                  | <p>Have any land-use changes and practices or environmental degradation either increased or reduced the flood/storm risk in the affected area (e.g. decreased natural areas, loss or encroachment of water bodies, deforestation, unsustainable land use etc)?</p> <p>What types of land policy exists in the region?</p> |

|                                      |                                                                                                                                                                                                                                                                                                                                                                                                                                                                                                                                                                                                                                                 |                                                                                                                                                                                                                                                        |
|--------------------------------------|-------------------------------------------------------------------------------------------------------------------------------------------------------------------------------------------------------------------------------------------------------------------------------------------------------------------------------------------------------------------------------------------------------------------------------------------------------------------------------------------------------------------------------------------------------------------------------------------------------------------------------------------------|--------------------------------------------------------------------------------------------------------------------------------------------------------------------------------------------------------------------------------------------------------|
|                                      | state of conservation<br>barrier island instability<br>inland buffer                                                                                                                                                                                                                                                                                                                                                                                                                                                                                                                                                                            | Have there been national or regional level land-reform policies that may exacerbate or alleviate the impacts of the storm?                                                                                                                             |
| Shelter                              | property value<br>parcel value<br>poor housing quality<br>structures<br>physical damageability                                                                                                                                                                                                                                                                                                                                                                                                                                                                                                                                                  | Is there information available on the types of housing and neighborhoods (e.g. housing stock, building material, size of households, location, etc.)?                                                                                                  |
| <b>Critical systems and services</b> | exposure of critical assets<br>contaminated water systems<br>medical services<br>share of the population without access to an improved water source<br>poor health infrastructure<br>fire stations<br>national-security facilities<br>police stations<br>facilities serving government functions<br>dependence on coastal services<br>decrease/strain in essential service provision<br>number of critical and essential facilities (civil-defense facilities)<br>share of population without access to improved sanitation<br>road networks<br>biodiversity and habitat protection<br>radio and television stations<br>groundwater consumption | Were critical infrastructure and services built to withstand this storm (e.g. wind speeds, flood depth)? Elaborate by type of system or service.                                                                                                       |
| <b>Storm Risk Management</b>         |                                                                                                                                                                                                                                                                                                                                                                                                                                                                                                                                                                                                                                                 |                                                                                                                                                                                                                                                        |
| Governance                           | limited institutional capacity<br>political system<br>slow institutional adaptation<br>Corruption perception index<br>share of female representatives in the National Parliament<br>distrust of authorities                                                                                                                                                                                                                                                                                                                                                                                                                                     | Which agencies are responsible for managing storm risk?<br><br>How are they coordinating with each other? Are there governance challenges?<br><br>Does the management of the shared water resources across governance boundaries influence storm risk? |
| Policies and plans                   | soft solution<br>forest management<br>environmental policy<br>protection area                                                                                                                                                                                                                                                                                                                                                                                                                                                                                                                                                                   | What policies or plans are in place to reduce and prevent negative impacts?                                                                                                                                                                            |

|                                           |                                                                                                                                                                                                                                          |                                                                                                                                                                                                                                                                                                                                                                                                                   |
|-------------------------------------------|------------------------------------------------------------------------------------------------------------------------------------------------------------------------------------------------------------------------------------------|-------------------------------------------------------------------------------------------------------------------------------------------------------------------------------------------------------------------------------------------------------------------------------------------------------------------------------------------------------------------------------------------------------------------|
|                                           | <p>unprotected building and infrastructure</p> <p>weak flood defenses</p> <p>poor drainage systems</p> <p>water management</p>                                                                                                           | <p>Have storm protection measures been implemented in the region (e.g. coastal defenses, dams, diversion canals, wetlands)?</p> <p>Are there examples of maladaptation?</p> <p>Are policies and plans being implemented and enforced?</p> <p>Are there any gaps?</p>                                                                                                                                              |
| Early warning and early action            | <p>inadequate forecasting systems</p> <p>lack of early warning</p> <p>poor access to information</p>                                                                                                                                     | <p>Does the region have a functional flood early warning system?</p> <p>Was the event forecasted?</p> <p>If so, with what lead time, accuracy? (break-down by sub-hazards: floods, storm surge, windspeeds)</p> <p>Were there internal government and/or public warnings of the storm/flood?</p> <p>If so, what do we know about who can access the information, and are there any gaps and other challenges?</p> |
| Emergency response                        | <p>limited evacuation options</p> <p>overcrowded shelters.</p> <p>evacuation failure</p> <p>speed of institutional set-up</p> <p>electrical outages</p> <p>basic necessities for residents</p> <p>limited or weak emergency response</p> | <p>What response was prompted by government authorities, INGOs and NGOs?</p> <p>Did any impacts on infrastructure influence the response, and if so how (e.g. damaged roads, disrupted communications)?</p> <p>Were widely accepted best-practices followed?</p>                                                                                                                                                  |
| Individual and household coping behaviors | <p>lack of flood memory</p> <p>historical memory gaps</p> <p>limited coping capacity</p>                                                                                                                                                 | <p>What positive or negative coping strategies are being used at the individual and household level?</p> <p>How did people's risk perception support or dissuade coping behaviors?</p>                                                                                                                                                                                                                            |
| Insurance and social protection           | <p>lack of insurance coverage</p>                                                                                                                                                                                                        | <p>Are there any insurance or financial instruments to support storm recovery for the country? (e.g. catastrophe insurance, bonds, pre-agreed credit lines etc.)</p> <p>Do people have access to insurance or social protection systems to reduce the impacts of the storm on households?</p> <p>To what extent will these instruments cover the expected impacts from the storm?</p>                             |
